# Supplementary material for: The Development of a Pipeline for the Identification and Validation of Small-Molecule RelA Inhibitors for Use as Anti-Biofilm Drugs
Source: PubMed Central journal article supplement (PMC7563162; doi:10.3390/microorganisms8091310), 2020-08-28
Supplement: microorganisms-08-01310-s001.pdf [file microorganisms-08-01310-s001.pdf]

1 **SUPPLEMENTARY INFORMATION**

2 **The Development of a Pipeline for the Identification and Validation of Small-Molecule RelA**  
3 **Inhibitors for Use as Anti-biofilm Drugs**

4 *Donald C. Hall Jr.<sup>1,2</sup>, Jarosław E. Król<sup>2</sup>, John P. Cahill<sup>1</sup>, Hai-Feng Ji<sup>1#</sup>, Garth D. Ehrlich<sup>2,3#</sup>*

5 *<sup>1</sup>Department of Chemistry; <sup>2</sup>Center for Advanced Microbial Processing, Center for Genomic Sciences,*  
6 *Center for Surgical Infections and Bacterial Biofilms, Institute of Molecular Medicine and Infectious*  
7 *Disease; Department of Microbiology & Immunology; <sup>3</sup>Department of Otolaryngology-Head and Neck*  
8 *Surgery; Drexel University College of Medicine, Drexel University, Philadelphia, PA*

9 #: Corresponding Authors

10

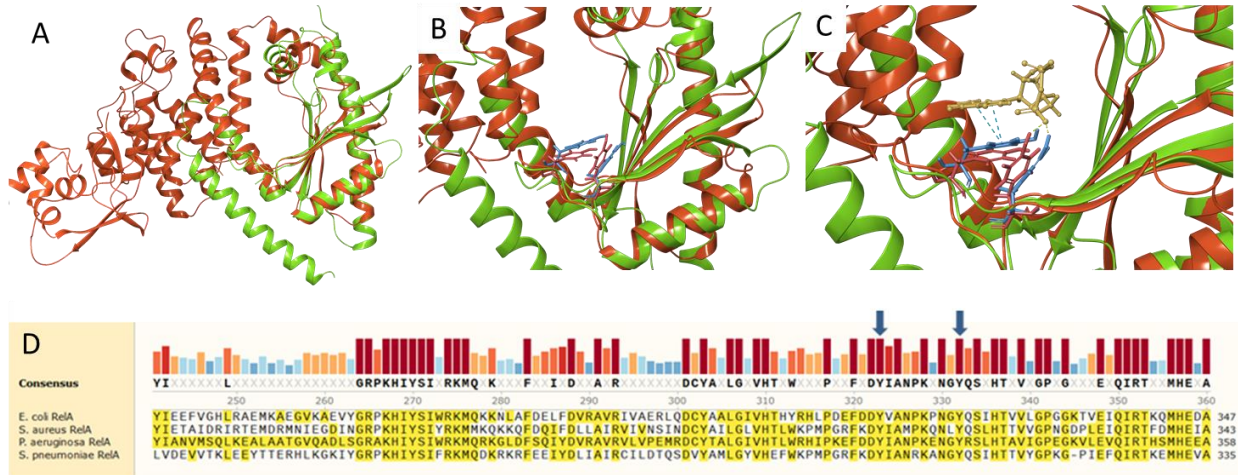

11

12 Figure S1. **RelA structure and sequence homology.** A) Structural alignment of known active site of *S.*  
 13 *aureus* RelP (green) with *E. coli* RelA (orange); B) Alignment of *S. aureus* RelP (green) with *E. coli* RelA  
 14 (orange) with two essential amino acids residues shown; C) GDP interactions with the essential residues  
 15 can be seen with H-bonding and  $\pi$ -stacking shown in dashed lines; D) Protein sequence alignment of  
 16 selected bacterial species (both Gram-positive and Gram-negative). Arrows denote conservation of the  
 17 essential residues shown in B among most bacterial species shown

18

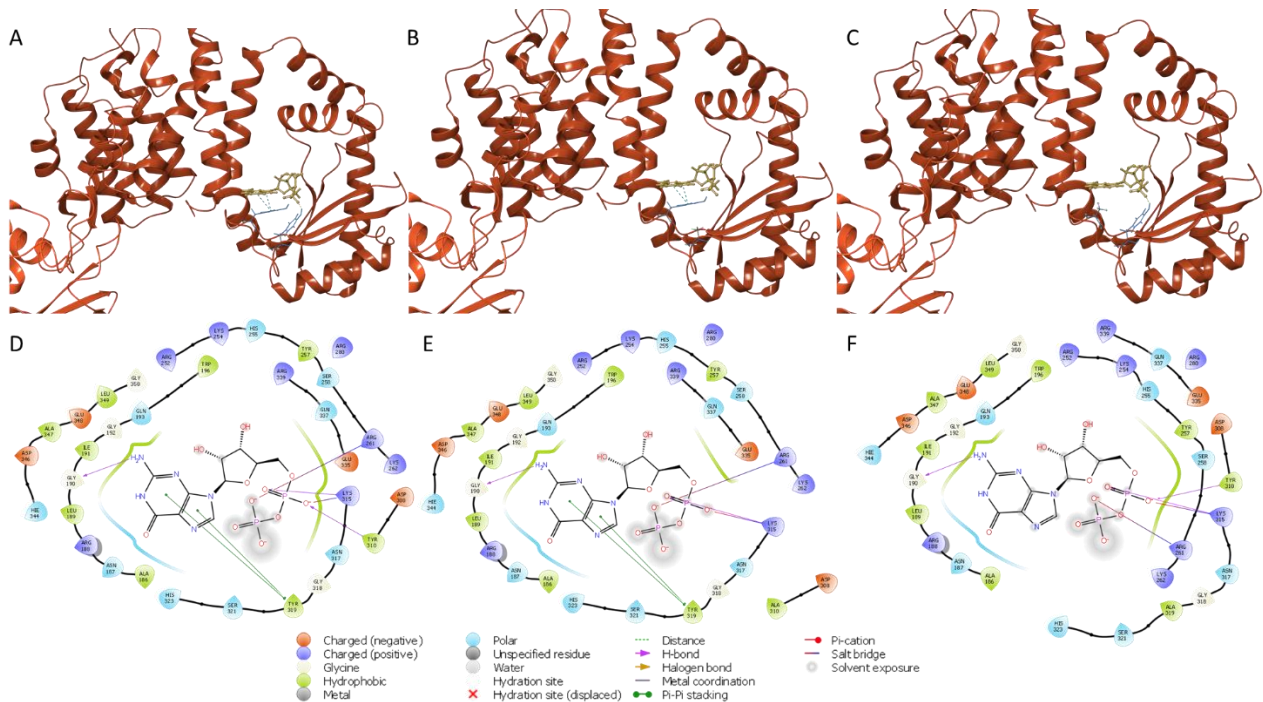

19

20 Figure S2. **RelA GDP interactions with and without amino acid mutations.** (A) 3D native RelA  
21 interaction (B) 3D Y/A-310 GDP interaction (C) 3D Y/A-319 GDP interaction (D) 2D native RelA  
22 interaction (E) 2D Y/A-310 GDP (F) 2D Y/A-319 GDP

23

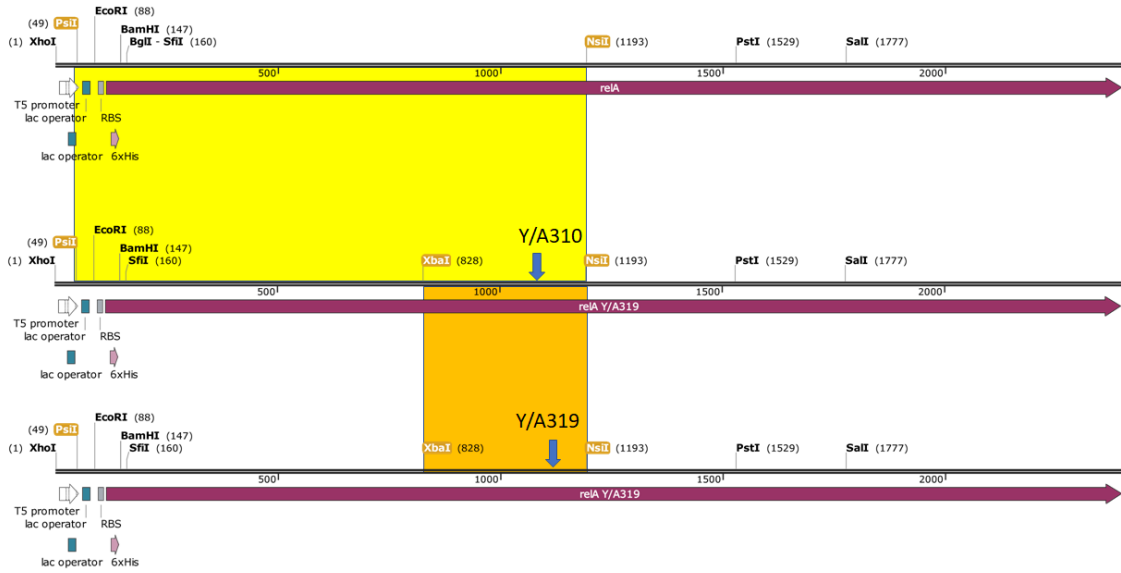

24

25 Figure S3. **RelA amino acid mutation scheme.** Arrows indicate where the mutation was introduced in the  
26 *relA* expression plasmid.

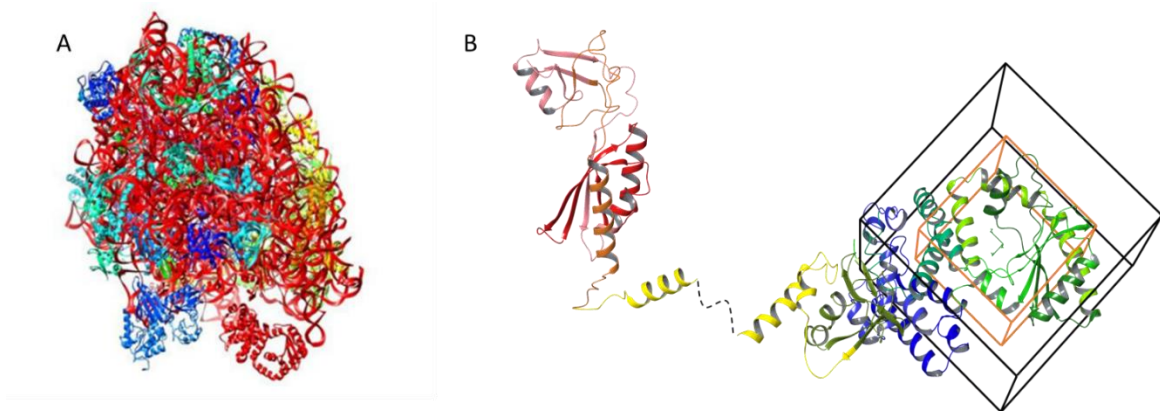

27

28 Figure S4. **Raw Cryo-EM structure of RelA (PDB: 5IQR).** RelA bound to a ribosome (A) and optimized  
29 RelA structure with docking grid box shown (B).

30

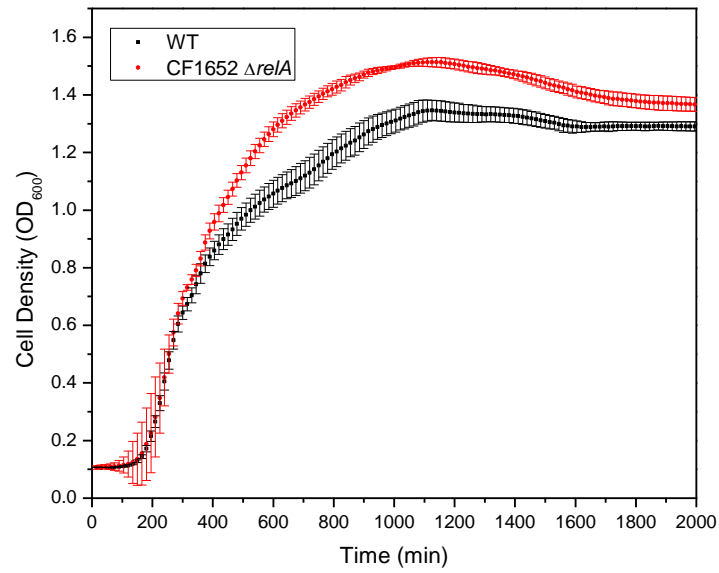

31

32 Fig S5. **Effect of *relA* and *relA/spotT* mutations.** Overnight growth curves of Wild Type *E. coli* and the  
 33 CF1652  $\Delta relA$  mutant.

34

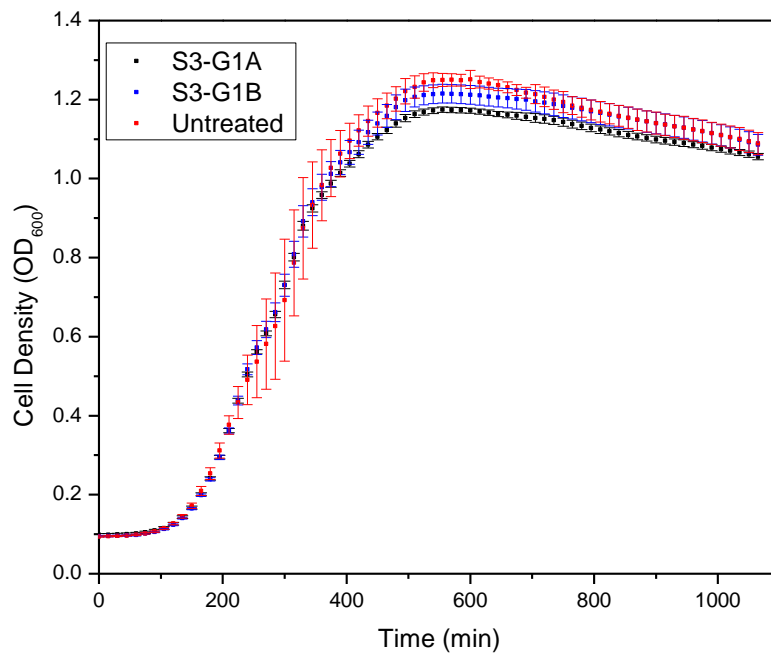

35

36 Figure S6. **Compound effect on planktonic growth of *E. coli* C.** *E. coli* C treated with compounds S3-  
37 G1A and S3-G1B ( $30 \mu\text{g}\cdot\text{mL}^{-1}$ ).

38

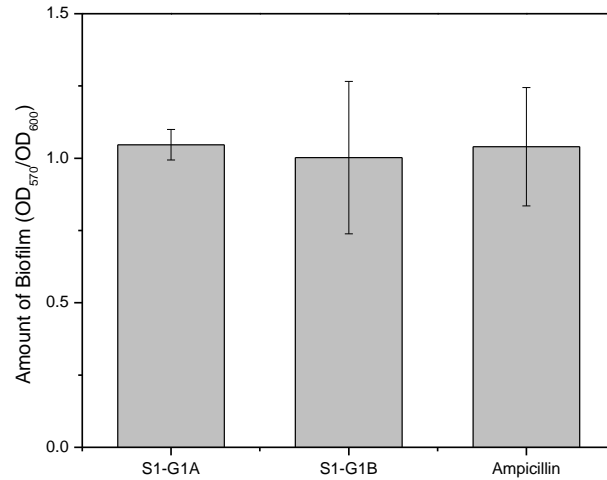

39

40 Figure S7. **Effect of compounds on inhibition of *E. coli* C biofilm.** S3-G1A and S3-G1B effect on the  
41 formation of biofilms using the crystal violet quantification method.

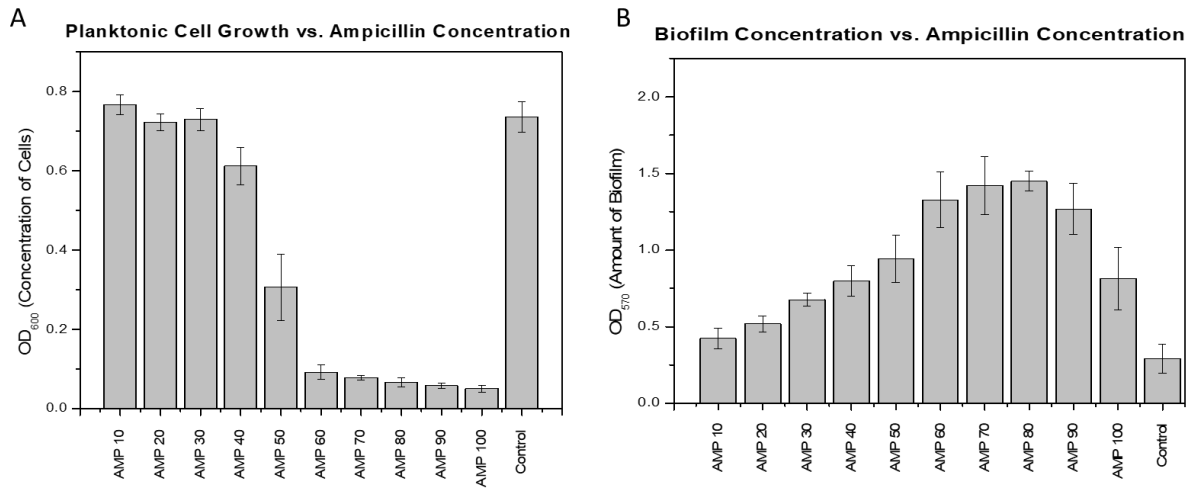

42

43 Figure S8. **Effect of ampicillin concentration on planktonic and biofilm growth.** A) Growth of cells in  
44 liquid culture at various concentrations of ampicillin (OD<sub>600</sub>). B) Amount of biofilm formed at various  
45 concentrations of ampicillin. (AMP# = AMP at #  $\mu\text{g}\cdot\text{mL}^{-1}$  concentration)

46 Table S1. **Bacterial strains and plasmids utilized in this work.** WT = wild type; Km = kanamycin; Cm  
 47 = chloramphenicol

| <b>Strain and plasmid</b>   | <b>Phenotype</b>                                                                                                                                                                                                                   | <b>Source</b>              |
|-----------------------------|------------------------------------------------------------------------------------------------------------------------------------------------------------------------------------------------------------------------------------|----------------------------|
| <i>E. coli</i> K12 MG1655   | WT                                                                                                                                                                                                                                 | Lab collection             |
| <i>E. coli</i> C            | WT                                                                                                                                                                                                                                 | Lab collection             |
| <i>E. coli</i> AG1 (ME5305) | F <sup>-</sup> , <a href="#">recA1</a> <a href="#">endA1</a> <a href="#">gyrA96</a> <a href="#">thi-1</a> <a href="#">hsdR17(r<sub>k</sub><sup>-</sup> m<sub>k</sub><sup>+</sup>)</a> <a href="#">supE44</a> <a href="#">relA1</a> | Kitagawa, M. <i>et al.</i> |
| <i>E. coli</i> CF1648       | WT                                                                                                                                                                                                                                 | M. Cashel                  |
| <i>E. coli</i> CF1652       | <i>relA</i> ::Km                                                                                                                                                                                                                   | M. Cashel                  |
| <i>E. coli</i> CF1693       | <i>relA</i> ::Km, <i>spoT</i> ::Cm                                                                                                                                                                                                 | M. Cashel                  |
| pJW2755-AM                  | pCA24N(GFP-) with <i>relA</i> gene ASKA plasmid, Cm <sup>R</sup>                                                                                                                                                                   | Kitagawa, M. <i>et al.</i> |
| pJEK2020-43                 | pJW2755AM with <i>Xba</i> I silent site and Y/A319 mutation                                                                                                                                                                        | This work                  |
| pJEK2020-20                 | pJW2755AM with <i>Xba</i> I silent site and Y/A310 mutation                                                                                                                                                                        | This work                  |

48

49
